# Supplementary material for: Locally advanced cervical cancer with bladder invasion: clinical outcomes and predictive factors for vesicovaginal fistulae
Source: PubMed Central journal article supplement (PMC5823628; doi:10.18632/oncotarget.24271), 2018-01-18
Supplement: oncotarget-09-9299-s001.pdf [file oncotarget-09-9299-s001.pdf]

# Locally advanced cervical cancer with bladder invasion: clinical outcomes and predictive factors for vesicovaginal fistulae

## SUPPLEMENTARY MATERIALS

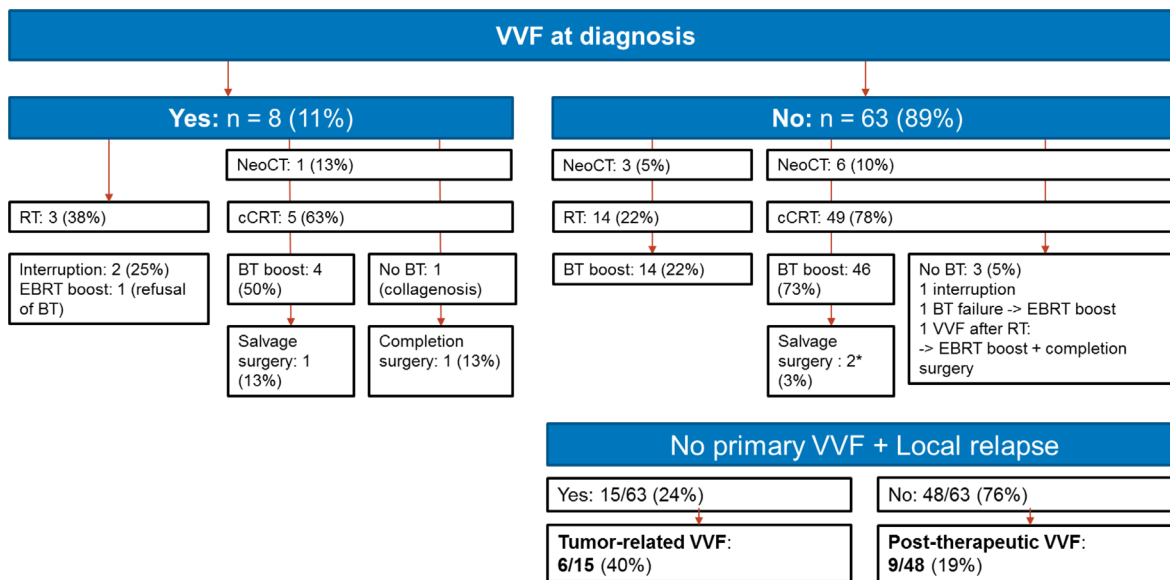

\* Both patients had VVF formation and suspicion of local recurrence but one had finally a complete pathological response

Supplementary Figure 1: Flowchart of patient according to the presence or the formation of vesicovaginal fistulae.

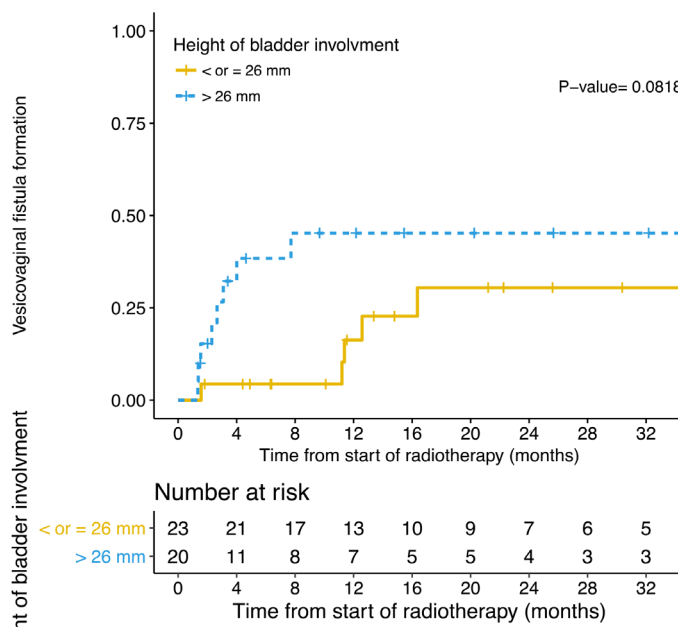

Univariate Cox P-value

Supplementary Figure 2: Rate of VVF formation according to the height of bladder wall involvement.

**Supplementary Table 1: Brachytherapy characteristics according to the technique**

| Characteristics                   |          |                            |                |                                    |                            |  |
|-----------------------------------|----------|----------------------------|----------------|------------------------------------|----------------------------|--|
| Brachytherapy                     |          | LDR                        |                | PDR                                |                            |  |
| <i>Nb of patients</i>             |          | 33 (46.5%)                 |                | 31 (43.7%)                         |                            |  |
| <i>Point A Dose</i>               |          | Mean ± SD                  | 69.9 ± 13.4    | Mean ± SD                          | 71.8 ± 5.9                 |  |
| <i>Duration of treatment</i>      |          | Mean ± SD                  | 3.2 ± 3.6 days | Mean ± SD                          | 5.5 ± 5.4 days             |  |
|                                   | <i>n</i> | Length of sources (mm)     |                | <i>n</i>                           | Length of activation       |  |
| <i>Intrauterine</i>               | 32       | Median: 60<br>Range: 24–88 |                | 31                                 | Median: 55<br>Range: 30–95 |  |
| <i>Right vaginal</i>              | 33       | Median: 32<br>Range: 32–48 |                | 31                                 | Median: 30<br>Range: 20–55 |  |
| <i>Left vaginal</i>               | 32       | Median: 32<br>Range: 32–48 |                | 31                                 | Median: 25<br>Range: 20–55 |  |
|                                   |          | LDR                        |                | PDR                                |                            |  |
| <b>Interstitial Brachytherapy</b> |          | Unilateral                 | 1              | Unilateral                         | 3 (9.7%)                   |  |
|                                   |          | Bilateral                  | (3.0%)         | Bilateral                          | 4 (16.1%)                  |  |
|                                   |          |                            | 0              |                                    |                            |  |
|                                   |          | Number of source           | 1              | Number of probe                    | Range: 1–4                 |  |
|                                   | Length   | 30                         | Length         | Median: 27.5 mm<br>Range: 15–95 mm |                            |  |
|                                   |          |                            |                | Number of pulses                   | Median: 34<br>Range: 29–56 |  |
|                                   |          |                            |                | Dose by pulse (cGy)                | Median: 27<br>Range: 25–35 |  |

**Supplementary Table 2: Prognostic factors for survival and local control (univariate analysis)**

|                                               | Tested factor | N pts | N event | OS     |                 | PFS     |        |                 | LCR     |        |                 |
|-----------------------------------------------|---------------|-------|---------|--------|-----------------|---------|--------|-----------------|---------|--------|-----------------|
|                                               |               |       |         | Cox–HR | <i>P</i> –value | N event | Cox HR | <i>P</i> –value | N event | Cox HR | <i>P</i> –value |
| Age                                           | >55 yrs       | 35/71 | 21/45   | 0.83   | .54             | 23/49   | 0.83   | .51             | 8/22    | 0.53   | .14             |
| <b>PS</b>                                     | ≥ 2           | 17/71 | 15/45   | 2.00   | .04*            | 15/49   | 1.98   | .04*            | 7/22    | 1.80   | .22             |
| Pathology                                     | NSCC          | 10/71 | 7/45    | 1.66   | .25             | 7/49    | 1.37   | .46             | 3/22    | 1.12   | .85             |
| Tobacco                                       | Yes           | 20/70 | 12/44   | 0.87   | .69             | 13/48   | 0.78   | .43             | 4/21    | 0.52   | .21             |
| ANC                                           | >7.5G/l       | 17/42 | 11/28   | 0.87   | .72             | 12/30   | 0.81   | .57             | 6/14    | 1.11   | .84             |
| WBC                                           | >10G/l        | 16/43 | 10/29   | 0.88   | .75             | 11/31   | 0.85   | .67             | 5/15    | 0.91   | .87             |
| Hb                                            | <11           | 25/46 | 20/31   | 1.45   | .31             | 21/33   | 1.36   | .39             | 7/15    | 0.67   | .44             |
| Bladder invasion histo/cysto–proven           | No            | 42/71 | 25/45   | 0.96   | .89             | 28/49   | 0.94   | .84             | 13/22   | 1.02   | .97             |
| Pelvic nodes                                  | Yes           | 42/71 | 29/45   | 1.83   | .05*            | 30/49   | 1.38   | .28             | 11/22   | 0.75   | .50             |
| <b>Para–aortic nodes</b>                      | Yes           | 21/71 | 16/45   | 3.52   | <.001*          | 17/49   | 2.50   | .005*           | 8/22    | 2.27   | .08             |
| MRI based volume                              | >80 cc        | 21/61 | 16/39   | 1.47   | .25             | 17/43   | 1.34   | .36             | 9/19    | 1.91   | .16             |
| <b>Tumor longest diameter</b>                 | >6 cm         | 35/61 | 24/39   | 1.09   | .79             | 26/43   | 0.94   | .84             | 11/19   | 0.86   | .74             |
| <b>Tumor ant–post diameter</b>                | >5.5 cm       | 31/61 | 23/39   | 2.00   | .04*            | 26/43   | 2.39   | .01*            | 13/19   | 2.82   | .03*            |
| <b>Height of the bladder wall involvement</b> | >26 mm        | 24/49 | 17/30   | 1.60   | .20             | 19/33   | 2.07   | .04*            | 10/14   | 3.38   | .03*            |
| MRI anterior necrosis                         | Yes           | 23/49 | 12/30   | 0.57   | .13             | 15/33   | 0.68   | .28             | 8/14    | 1.14   | .80             |
| MRI necrosis                                  | Yes           | 32/49 | 18/30   | 0.64   | .24             | 21/33   | 0.77   | .48             | 10/14   | 1.11   | .87             |
| Hydronephrosis (bilat vs no or unilat)        | Bilat         | 20/71 | 16/45   | 1.51   | .20             | 16/49   | 1.32   | .38             | 7/22    | 1.30   | .57             |
| Parametrial invasion (bilat vs no or unilat)  | Bilat         | 61/71 | 39/45   | 0.97   | .95             | 42/49   | 0.88   | .77             | 18/22   | 0.74   | .59             |
| VVF at any moment                             | Yes           | 23/71 | 15/45   | 1.16   | .80             | 17/49   | 1.15   | .65             | 11/22   | 2.15   | .08             |
| <b>RVF at any moment</b>                      | Yes           | 8/71  | 5/45    | 0.92   | .91             | 7/49    | 1.87   | .16             | 6/22    | 3.95   | .01*            |
| Overall time of RT                            | >37 days      | 20/71 | 16/45   | 0.95   | .43             | 17/49   | 1.59   | .14             | 9/22    | 2.00   | .12             |
| Pelvic RT dose                                | <45Gy         | 7/71  | 4/45    | 1.29   | .38             | 4/49    | 1.41   | .53             | 4/22    | 4.19   | .03*            |
| Neoadjuvant CT                                | Yes           | 10/71 | 6/45    | 1.65   | .69             | 6/49    | 0.71   | .41             | 3/22    | 0.87   | .82             |
| <b>Concomitant CT</b>                         | Yes           | 54/71 | 30/45   | 0.84   | .04*            | 32/49   | 0.37   | .002*           | 12/22   | 0.29   | .01*            |
| <b>Completion of Concomitant CT</b>           | Yes           | 24/64 | 12/42   | 0.50   | .02*            | 13/46   | 0.45   | .01*            | 6/22    | 0.50   | .13             |
| Brachytherapy                                 | Yes           | 64/71 | 40/45   | 0.47   | .41             | 44/49   | 0.82   | .69             | 18/22   | 0.36   | .10             |
| Interstitial probes                           | Yes           | 7/64  | 3/40    | 0.60   | .37             | 3/44    | 0.50   | .20             | 1/18    | 0.40   | .31             |
| PDR vs LDR                                    | PDR           | 31/64 | 16/40   | 0.66   | .68             | 19/44   | 0.91   | .76             | 8/18    | 0.82   | .68             |
| OTT                                           | >55 days      | 26/64 | 18/40   | 0.87   | .50             | 20/44   | 0.99   | .97             | 7/18    | 0.77   | .59             |
| HR–CTV volume                                 | >40 cc        | 17/31 | 10/16   | 0.81   | .52             | 12/19   | 1.29   | .60             | 5/8     | 1.43   | .62             |
| HR–CTV D90                                    | <80 Gy        | 24/30 | 13/15   | 0.70   | .99             | 15/18   | 0.81   | .74             | 6/8     | 0.55   | .49             |
| IR–CTV volume                                 | >100 cc       | 16/31 | 8/16    | 1.01   | .47             | 10/19   | 1.26   | .62             | 5/8     | 2.02   | .33             |
| IR–CTV D90                                    | <60 Gy        | 9/30  | 5/15    | 0.68   | .77             | 6/18    | 0.81   | .67             | 2/8     | 0.55   | .45             |
| Points A dose                                 | >70 Gy        | 26/45 | 17/25   | 0.85   | .52             | 18/28   | 1.30   | .51             | 8/11    | 1.98   | .29             |
| ICRU bladder point                            | >70 Gy        | 33/57 | 24/34   | 1.32   | .25             | 26/38   | 1.86   | .07             | 10/16   | 1.44   | .47             |
| ICRU rectal point                             | >70 Gy        | 33/58 | 23/35   | 1.54   | .70             | 25/39   | 1.22   | .55             | 9/16    | 0.97   | .95             |
| Bladder D2cc                                  | >75 Gy        | 15/30 | 8/15    | 1.15   | .17             | 10/18   | 1.73   | .25             | 4/8     | 1.35   | .68             |
| Sigmoid D2cc                                  | >60 Gy        | 9/30  | 4/15    | 2.12   | .47             | 6/18    | 1.29   | .62             | 4/8     | 2.61   | .18             |
| Rectum D2cc                                   | >65 Gy        | 15/30 | 8/15    | 0.66   | .45             | 9/18    | 1.27   | .63             | 3/8     | 0.69   | .61             |

NSCC: non–squamous cell carcinoma, ANC, WBC, Hb: absolute neutrophil count, white blood cells count and hemoglobin concentration at treatment start, VVF, RVF: vesico–, recto–vaginal fistulae, OTT: overall treatment time, HR–CTV: high–risk clinical target volume, IR–CTV: intermediate risk clinical target volume; OS: overall survival; PFS: progression–free survival; LCR: local control rates; *P*–values < 0.1 in bold. \*: Significant *P*–values.

**Supplementary Table 3: Prognostic factors of vesicovaginal fistula formation, and associated risk of formation at 1 year from the start of radiotherapy (univariate analysis)**

| Variables                                 | Tested factor | N pts | N event | Risk of VVF at 1yr from the start of radiotherapy (%) |             | Cox-HR | CI 95%      | P-value |
|-------------------------------------------|---------------|-------|---------|-------------------------------------------------------|-------------|--------|-------------|---------|
|                                           |               |       |         | Without                                               | With factor |        |             |         |
| Age                                       | >55 yrs       | 32/63 | 5/15    | 29                                                    | 18          | 0.40   | 0.14–1.17   | 0.08    |
| PS                                        | ≥2            | 14/63 | 3/15    | 22                                                    | 28          | 0.87   | 0.25–3.1    | 0.83    |
| Pathology                                 | NSCC          | 8/63  | 2/15    | 24                                                    | 17          | 1.04   | 0.23–4.63   | 0.96    |
| Tabaco                                    | Yes           | 18/63 | 4/15    | 25                                                    | 18          | 0.80   | 0.25–2.5    | 0.69    |
| ANC                                       | >7.5 G/l      | 13/36 | 5/10    | 20                                                    | 32          | 2.21   | 0.64–7.66   | 0.22    |
| WBC                                       | >10 G/l       | 14/37 | 5/10    | 19                                                    | 30          | 2.12   | 0.61–7.38   | 0.24    |
| Hb                                        | <11           | 21/40 | 6/11    | 17                                                    | 31          | 1.17   | 0.36–3.85   | 0.79    |
| Bladder invasion histo/<br>cysto-proven   | No            | 37/63 | 10/15   | 23                                                    | 23          | 1.58   | 0.54–4.63   | 0.39    |
| Pelvic nodes                              | Yes           | 37/63 | 7/15    | 25                                                    | 22          | 0.67   | 0.24–1.86   | 0.44    |
| Para-aortic nodes                         | Yes           | 19/63 | 3/15    | 24                                                    | 23          | 0.75   | 0.21–2.7    | 0.65    |
| <b>MRI based volume</b>                   | >80 cc        | 21/42 | 3/12    | 37                                                    | 17          | 0.32   | 0.09–1.19   | 0.07    |
| Tumor longest diameter                    | >6 cm         | 30/54 | 8/14    | 18                                                    | 31          | 1.08   | 0.38–3.13   | 0.88    |
| Tumor ant–post diameter                   | >5.5 cm       | 27/54 | 7/14    | 20                                                    | 31          | 1.22   | 0.43–3.5    | 0.71    |
| Height of the bladder wall<br>involvement | >26 mm        | 20/43 | 8/13    | 16                                                    | 45          | 2.66   | 0.87–8.20   | 0.08    |
| <b>MRI anterior necrosis</b>              | Yes           | 18/43 | 12/13   | 0                                                     | 63          | 22.45  | 2.91–173.32 | 1.10–5  |
| <b>MRI necrosis</b>                       | Yes           | 26/43 | 12/13   | 0                                                     | 45          | 9.03   | 1.17–69.55  | <0.01   |
| Hydronephrosis                            | Bilat         | 16/63 | 5/15    | 18                                                    | 39          | 1.68   | 0.57–4.93   | 0.36    |
| Parametrial invasion                      | Bilat         | 53/63 | 14/15   | 10                                                    | 26          | 3.15   | 0.41–23.95  | 0.19    |
| <b>RVF at any moment</b>                  | Yes           | 7/63  | 5/15    | 18                                                    | 62          | 4.83   | 1.63–14.26  | 0.01    |
| Overall time of RT                        | >37 days      | 18/63 | 3/15    | 26                                                    | 17          | 0.57   | 0.16–2.01   | 0.35    |
| Pelvic RT dose                            | <45 Gy        | 5/63  | 1/15    | 23                                                    | 20          | 1.26   | 0.16–9.61   | 0.83    |
| Neoadjuvant CT                            | Yes           | 9/63  | 3/15    | 21                                                    | 38          | 1.57   | 0.44–5.58   | 0.50    |
| Concomitant CT                            | Yes           | 49/63 | 11/15   | 31                                                    | 21          | 0.69   | 0.22–2.19   | 0.54    |
| Completion of<br>Concomitant CT           | Yes           | 22/57 | 8/15    | 23                                                    | 29          | 1.62   | 0.58–4.47   | 0.35    |
| Interstitial probes                       | Yes           | 7/60  | 2/14    | 23                                                    | 17          | 1.30   | 0.29–5.84   | 0.74    |
| PDR vs LDR                                | PDR           | 29/60 | 7/14    | 23                                                    | 22          | 1.03   | 0.36–2.95   | 0.95    |
| OTT                                       | >55 days      | 26/60 | 6/14    | 22                                                    | 22          | 0.87   | 0.3–2.5     | 0.79    |
| <b>HR-CTV volume</b>                      | >40 cc        | 16/29 | 6/7     | 8                                                     | 32          | 4.72   | 0.57–39.23  | 0.09    |
| HR-CTV D90                                | <80 Gy        | 23/28 | 6/7     | 25                                                    | 22          | 1.15   | 0.14–9.66   | 0.89    |
| <b>IR-CTV volume</b>                      | >100 cc       | 15/29 | 6/7     | 8                                                     | 36          | 6.42   | 0.77–53.66  | 0.04    |
| IR-CTV D90                                | <60 Gy        | 8/28  | 2/7     | 22                                                    | 25          | 0.98   | 0.19–5.04   | 0.98    |
| Points A dose                             | >70 Gy        | 23/41 | 5/9     | 24                                                    | 13          | 0.92   | 0.25–3.41   | 0.90    |
| ICRU bladder point                        | >70 Gy        | 32/53 | 4/10    | 25                                                    | 16          | 0.40   | 0.11–1.41   | 0.15    |
| ICRU rectal point                         | >70 Gy        | 31/54 | 5/11    | 23                                                    | 20          | 0.63   | 0.19–2.07   | 0.45    |
| <b>Bladder D2cc</b>                       | >75 Gy        | 14/28 | 1/7     | 36                                                    | 9           | 0.15   | 0.02–1.23   | 0.03    |
| <b>Sigmoid D2cc</b>                       | >60 Gy        | 9/28  | 5/7     | 11                                                    | 47          | 7.17   | 1.37–37.43  | 0.01    |
| Rectum D2cc                               | >65 Gy        | 15/28 | 4/7     | 17                                                    | 28          | 1.43   | 0.32–6.4    | 0.64    |

NSCC: non-squamous cell carcinoma, ANC, WBC, Hb: absolute neutrophil count, white blood cells count and hemoglobin concentration at treatment start, VVF, RVF: vesico-, recto-vaginal fistulae, OTT: overall treatment time, HR-CTV: high-risk clinical target volume, IR-CTV: intermediate risk clinical target volume.  
P-values < .01 in bold. \*: Significant P-values.

**Supplementary Table 4: Prognostic factors of vesicovaginal fistula formation, other multivariate models**

| <b>Vesicovaginal fistula formation</b> |              |               |               |                |
|----------------------------------------|--------------|---------------|---------------|----------------|
| <b>Multivariate analysis</b>           | <b>Model</b> | <b>Cox-HR</b> | <b>CI 95%</b> | <b>P-value</b> |
| <b>MRI anterior necrosis</b>           | 43 pts       | 18.20         | 2.2-148       | 0.007*         |
| <b>RVF at any moment</b>               | 13 events    | 1.85          | 0.58-5.85     | 0.30           |

| <b>Vesicovaginal fistula formation</b> |              |               |               |                |
|----------------------------------------|--------------|---------------|---------------|----------------|
| <b>Multivariate analysis</b>           | <b>Model</b> | <b>Cox-HR</b> | <b>CI 95%</b> | <b>P-value</b> |
| <b>MRI anterior necrosis</b>           | 43 pts       | 20.82         | 2.7-163       | 0.004*         |
| <b>Age ≥ 55 years</b>                  | 13 events    | 0.72          | 0.22-2.37     | 0.59           |

| <b>Vesicovaginal fistula formation</b> |              |               |               |                |
|----------------------------------------|--------------|---------------|---------------|----------------|
| <b>Multivariate analysis</b>           | <b>Model</b> | <b>Cox-HR</b> | <b>CI 95%</b> | <b>P-value</b> |
| <b>MRI anterior necrosis</b>           | 42 pts       | 18.60         | 2.4-211       | 0.006*         |
| <b>MRI based volume &gt; 80 cc</b>     | 12 events    | 0.63          | 0.17-2.38     | 0.49           |
